# Supplementary material
Source: PubMed Central journal article supplement (PMC4425277)
Supplement: NIHMS686089-supplement-supplemental_figure_1.pdf [file NIHMS686089-supplement-supplemental_figure_1.pdf]

# Cell Cycle Genes

|                              | <u>Gene Name</u>  | <u>Reported Function</u>                                | <u>Primers</u>                                    |
|------------------------------|-------------------|---------------------------------------------------------|---------------------------------------------------|
| Cell Cycle Progression Genes | <b>apc</b>        | degrades securin, allowing chromosome segregation       | F-ATGGAGTCATGGTGGGAGTT<br>R-GCCAAGCCTCAGCTACAAAC  |
|                              | <b>cak</b>        | phosphorylates cdk2 to facilitate G1/S transition       | F-TCTTCAAAGCCAAGCACGTA<br>R-ATTTCTCTGAGGGCCTGGTT  |
|                              | <b>cdc20</b>      | activates apc in mitosis                                | F-ATGGAGCAGCCTGGAGACTA<br>R-TGTTCCAACCTGAGGGAGCTT |
|                              | <b>cdc25</b>      | activates cdc2/cyclin B for G2/M                        | F-CTCTACCTGCTCGAGGGAAG<br>R-GTCACAGTCTTGGCATCCT   |
|                              | <b>cyclin A</b>   | G2 phase-specific                                       | F-ATCGCCCAGACAGAGAAGAA<br>R-GCATTGACAAGCATCAGGA   |
|                              | <b>cyclin B</b>   | triggers mitosis                                        | F-GCTGTGGATAGCCAGAGGTT<br>R-GGCTTGAAGCAGCAGTAAC   |
|                              | <b>cyclin D1</b>  | multi-phase pleiotropic roles                           | F-GCGTACCCTGACACCAATCT<br>R-CTCTTCGCACTTCTGCTCCT  |
|                              | <b>cyclin E1</b>  | facilitates entry into S phase                          | F-CTGAGTTCCAAGCCCAAGTC<br>R-GCTGACTGCTATCCTCGCTT  |
|                              | <b>e2f-1</b>      | DNA/chromosomal replication activation                  | F-TCGCAGATCGTCATCATCTC<br>R-CAGTCTCCAGATCCAGCCTC  |
|                              | <b>hct1</b>       | activates apc in G1                                     | F-ATGGACCAGGACTATGAGCG<br>R-TGATCCTGTGGAAGTTCACG  |
|                              | <b>scf</b>        | substrate for c-kit tyrosine ligase                     | F-GCTCCAGAACAGCTAAACGG<br>R-CCGCAGATCTCCTTGGTTT   |
| Cell Cycle Arrest Genes      | <b>p16</b>        | inhibits cdk4                                           | F-CGTGAACATGTTGTTGAGGC<br>R-CGAATCTGCACCGTAGTTGA  |
|                              | <b>p21</b>        | cyclin-dependent kinase inhibitor (active in G1)        | F-TCCACAGCGATATCCAGACA<br>R-ACGAAGTCAAAGTTCACCG   |
|                              | <b>p27</b>        | inhibits multiple targets for G1 arrest                 | F-TTGGGTCTCAGGCAAACCTCT<br>R-TCTTCTGTTCTGTTGGCCCT |
|                              | <b>p53</b>        | pleiotropic: DNA repair, cell cycle pause and apoptosis | F-CTAGCATTGAGCCCTCATC<br>R-CAACAGATCGTCCATGCAGT   |
|                              | <b>rb</b>         | prevents DNA synthesis by binding/inhibiting e2f-1      | F-GACTCCTGGCTCATGGTTGT<br>R-ATGGCATGATCTGCACAAGA  |
|                              | <b>wee1kinase</b> | binds and inactivates cdc2/cyclin B complex             | F-CCTCCGCACAAGACCTTC<br>R-GGAGTTTAAACAGAGCCGGAA   |
