# Supplementary material
Source: PubMed Central journal article supplement (PMC4425277)

**a**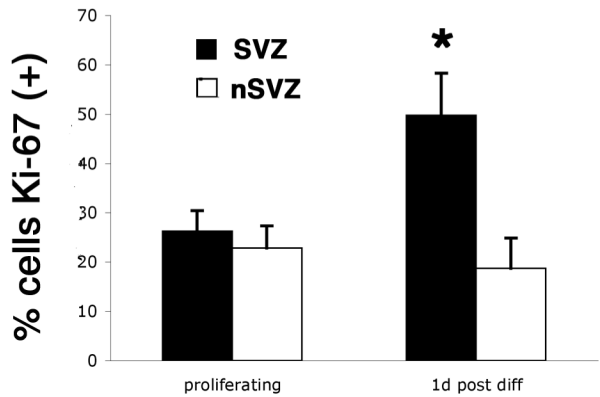**b****Ki-67  $\beta$ -III-tubulin DAPI**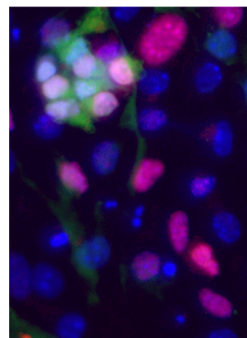

Supplement: NIHMS686089-supplement-supplemental_figure_3.pdf [file NIHMS686089-supplement-supplemental_figure_3.pdf]
